# Supplementary material for: Attenuation of In Vitro and In Vivo Virulence Is Associated with Repression of Gene Expression of AIG1 Gene in Entamoeba histolytica
Source: MDPI journal article supplement (doi:10.3390/pathogens12030489), 2023-03-21
Supplement: s1 [file s1]

**Table S3. Genes upregulated in HM-1:IMSS compared to UG10**

| Accession number | x-fold change | Gene annotation                             |
|------------------|---------------|---------------------------------------------|
| EHI_035670       | 155.9296      | Hypothetical protein                        |
| EHI_042720       | 51.956474     | 60S ribosomal protein L29                   |
| EHI_127380       | 50.387486     | Rab family GTPase                           |
| EHI_022490       | 46.480103     | AIG1 family protein, putative               |
| EHI_129740       | 32.194775     | Rab family GTPase                           |
| EHI_180390       | 31.23464      | AIG1 family protein, putative               |
| EHI_038440       | 25.656067     | Hypothetical protein                        |
| EHI_065790       | 20.877924     | Rab family GTPase                           |
| EHI_199820       | 20.453114     | Rab family GTPase                           |
| EHI_041465       | 13.361166     | AIG1 family protein, putative               |
| EHI_118280       | 11.861932     | Ras family protein                          |
| EHI_109120       | 11.595099     | AIG1 family protein, putative               |
| EHI_022500       | 11.464334     | AIG1 family protein                         |
| EHI_072130       | 11.015177     | Lipase, putative                            |
| EHI_088600       | 9.8585205     | Ribosomal protein S30, putative             |
| EHI_142160       | 8.95683       | Hypothetical protein                        |
| EHI_115160       | 6.455674      | AIG1 family protein                         |
| EHI_127440       | 6.3614845     | Tyrosine kinase, putative                   |
| EHI_035680       | 5.8673716     | Hydrolase, carbon-nitrogen family           |
| EHI_163480       | 5.4945803     | 90 kDa heat shock protein, putative         |
| EHI_023620       | 5.1501603     | Hypothetical protein                        |
| EHI_094370       | 4.851954      | Hypothetical protein                        |
| EHI_174570       | 4.5171866     | Hypothetical protein                        |
| EHI_136940       | 4.451498      | AIG1 family protein, putative               |
| EHI_176580       | 4.394288      | AIG1 family protein, putative               |
| EHI_185250       | 4.327921      | Hypothetical protein                        |
| EHI_174600       | 4.2813544     | Hypothetical protein                        |
| EHI_023610       | 4.1226306     | Protein kinase, putative                    |
| EHI_180400       | 3.37778       | Hypothetical protein                        |
| EHI_185230       | 3.2681186     | Protein kinase, putative                    |
| EHI_185260       | 3.2194395     | Hypothetical protein                        |
| EHI_185290       | 3.002424      | Ran GTPase-activating protein, putative     |
| EHI_107140       | 2.9975307     | Rab family GTPase                           |
| EHI_174640       | 2.97003       | Glucosamine-6-phosphate isomerase, putative |
| EHI_194280       | 2.806804      | Rab family GTPase                           |
| EHI_185230       | 2.7505772     | Protein kinase, putative                    |
| EHI_092310       | 2.5931044     | Hypothetical protein                        |
| EHI_144390       | 2.5532148     | Hypothetical protein                        |
| EHI_148580       | 2.5328627     | Choline/ethanolamine kinase, putative       |
| EHI_174510       | 2.486747      | Hypothetical protein                        |

|            |           |                                                      |
|------------|-----------|------------------------------------------------------|
| EHI_174580 | 2.4361563 | Hypothetical protein                                 |
| EHI_164900 | 2.3615165 | Rab family GTPase                                    |
| EHI_114770 | 2.3058298 | Hypothetical protein                                 |
| EHI_199600 | 2.2366023 | SKIP/SNW domain protein                              |
| EHI_054690 | 2.1680312 | Metal dependent hydrolase, putative                  |
| EHI_170080 | 2.1210775 | WD domain containing protein                         |
| EHI_187080 | 2.0843754 | Hypothetical protein                                 |
| EHI_168400 | 2.0842412 | tRNA (guanine-N(1)-)-methyltransferase TRM10         |
| EHI_151930 | 2.0600083 | hypothetical protein, conserved                      |
| EHI_104570 | 2.0508208 | ubiquitin ligase, putative                           |
| EHI_048190 | 2.0240479 | Hypothetical protein                                 |
| EHI_154690 | 1.8927152 | Hypothetical protein                                 |
| EHI_098250 | 1.8904233 | MutT/nudix family protein                            |
| EHI_048140 | 1.8661666 | Hypothetical protein                                 |
| EHI_120930 | 1.8553259 | Protein kinase domain containing protein             |
| EHI_100260 | 1.8314421 | Hypothetical protein, conserved                      |
| EHI_008420 | 1.8193461 | Hypothetical protein                                 |
| EHI_055340 | 1.8114331 | Rho GTPase activating protein                        |
| EHI_170150 | 1.8038363 | Hypothetical protein                                 |
| EHI_199620 | 1.7798458 | Hypothetical protein, conserved                      |
| EHI_185280 | 1.7648082 | Phosphoglucomutase/phosphomannomutase family protein |
| EHI_008680 | 1.7334363 | Ubiquitin carboxyl-terminal hydrolase family protein |
| EHI_170020 | 1.6425189 | Beta-galactosidase, putative                         |
| EHI_050650 | 1.6322083 | Protein kinase, putative                             |
| EHI_105280 | 1.628754  | Hypothetical protein                                 |
| EHI_073350 | 1.6281565 | HAD hydrolase, family IA, variant 3                  |
| EHI_124420 | 1.6024048 | Hypothetical protein                                 |
| EHI_115280 | 1.6017302 | Hypothetical protein                                 |
| EHI_021190 | 1.5774556 | Hypothetical protein                                 |
| EHI_180780 | 1.560256  | Hypothetical protein                                 |
| EHI_186990 | 1.5377846 | Tyrosine kinase, putative                            |
| EHI_087640 | 1.5316033 | Protein kinase with ankyrin repeats, putative        |
| EHI_008370 | 1.5200183 | Hypothetical protein                                 |
| EHI_040470 | 1.4708986 | Hypothetical protein, conserved domain containing    |
| EHI_008610 | 1.4694138 | Hypothetical protein, conserved                      |
| EHI_098270 | 1.4673413 | RhoGAP domain containing protein                     |
| EHI_018610 | 1.4464959 | Hypothetical protein                                 |
| EHI_050740 | 1.4409083 | L-asparaginase, putative                             |
| EHI_174670 | 1.4203801 | Proteasome beta subunit, putative                    |
| EHI_140760 | 1.4020662 | Hypothetical protein                                 |

|            |           |                                                   |
|------------|-----------|---------------------------------------------------|
| EHI_114780 | 1.3803723 | Hypothetical protein                              |
| EHI_088060 | 1.3618989 | Hypothetical protein                              |
| EHI_135020 | 1.3577846 | Hypothetical protein                              |
| EHI_186950 | 1.3559422 | Protein phosphatase domain-containing protein     |
| EHI_158150 | 1.3225229 | LIM zinc finger domain containing protein         |
| EHI_186770 | 1.3183279 | Actin-binding protein, cofilin/tropomyosin family |
| EHI_010600 | 1.3011776 | BAR/SH3 domain containing protein                 |
| EHI_096240 | 1.2941746 | Hypothetical protein                              |
| EHI_052780 | 1.2731665 | TolA-like protein, putative                       |
| EHI_148170 | 1.2597117 | Protein phosphatase regulatory subunit, putative  |
| EHI_040590 | 1.258059  | Hypothetical protein                              |
| EHI_174140 | 1.2565365 | Hypothetical protein                              |
| EHI_096650 | 1.1870943 | Histone H3, putative                              |
