# Supplementary material for: Attenuation of In Vitro and In Vivo Virulence Is Associated with Repression of Gene Expression of AIG1 Gene in Entamoeba histolytica
Source: MDPI journal article supplement (doi:10.3390/pathogens12030489), 2023-03-21
Supplement: s1 [file s1]

**Table S4. Genes upregulated in UG10 compared to HM-1:IMSS**

| <b>Accession number</b> | <b>x-fold change</b> | <b>Gene annotation</b>                         |
|-------------------------|----------------------|------------------------------------------------|
| EHI_047820              | 35.470085            | Hypothetical protein                           |
| EHI_058100              | 24.578333            | Hypothetical protein                           |
| EHI_125020              | 11.964578            | Hypothetical protein                           |
| EHI_027750              | 11.405656            | Hypothetical protein                           |
| EHI_050810              | 11.189768            | WH2 motif domain containing protein            |
| EHI_187090              | 11.131988            | Rab family GTPase                              |
| EHI_178000              | 10.960888            | Hypothetical protein                           |
| EHI_050985              | 10.440165            | Hypothetical protein                           |
| EHI_065260              | 10.397165            | Hypothetical protein                           |
| EHI_107040              | 10.112236            | Hypothetical protein                           |
| EHI_039590              | 9.344586             | Hypothetical protein                           |
| EHI_149530              | 8.659974             | Hypothetical protein                           |
| EHI_134960              | 8.332713             | S-phase kinase-associated protein 1A           |
| EHI_163480              | 8.294479             | Heat shock protein 90, putative                |
| EHI_123490              | 8.284656             | Heat shock protein 70, putative                |
| EHI_022600              | 8.218277             | Iron-sulfur flavoprotein, putative             |
| EHI_193060              | 8.029789             | Hypothetical protein                           |
| EHI_103260              | 7.8080792            | Iron-sulfur flavoprotein, putative             |
| EHI_171070              | 7.7838106            | Conserved hypothetical protein                 |
| EHI_014290              | 7.078602             | Conserved hypothetical protein                 |
| EHI_022270              | 6.501204             | Hypothetical protein                           |
| EHI_050490              | 6.311656             | Hypothetical protein                           |
| EHI_106290              | 6.2242885            | Hypothetical protein                           |
| EHI_194180              | 6.223766             | Hypothetical protein                           |
| EHI_181710              | 6.1745934            | Iron-sulfur flavoprotein, putative             |
| EHI_041580              | 5.8728304            | Conserved hypothetical protein                 |
| EHI_067720              | 5.6632223            | Iron-sulfur flavoprotein, putative             |
| EHI_201420              | 5.4009976            | Hypothetical protein                           |
| EHI_102490              | 5.1167483            | Conserved hypothetical protein                 |
| EHI_057550              | 5.030111             | Methionine gamma-lyase, putative               |
| EHI_083760              | 4.6744676            | Conserved hypothetical protein                 |
| EHI_114000              | 4.542217             | Hypothetical protein                           |
| EHI_083760              | 4.46397              | Hypothetical protein                           |
| EHI_172850              | 4.442909             | SURFACE antigen ariel1-RELATED                 |
| EHI_166410              | 4.2159805            | Myb-like DNA-binding domain containing protein |
| EHI_192500              | 3.896756             | U2 snRNP auxiliary factor, putative            |
| EHI_135140              | 3.7202058            | Hypothetical protein                           |
| EHI_144390              | 3.5781713            | Hypothetical protein                           |
| EHI_080200              | 3.5284407            | Surface antigen ariel1, putative               |
| EHI_123700              | 3.423494             | Hypothetical protein                           |
| EHI_083760              | 3.3183644            | Hypothetical protein                           |
| EHI_135140              | 3.3126054            | Hypothetical protein                           |
| EHI_041580              | 3.2655358            | Conserved hypothetical protein                 |
| EHI_027750              | 3.2400677            | Hypothetical protein                           |
| EHI_040440              | 3.2022326            | Hypothetical protein                           |

|            |           |                                                        |
|------------|-----------|--------------------------------------------------------|
| EHI_171070 | 2.867967  | Hypothetical protein                                   |
| EHI_067090 | 2.643976  | Hypothetical protein                                   |
| EHI_132420 | 2.632977  | Hypothetical protein                                   |
| EHI_160850 | 2.6274683 | Hypothetical protein                                   |
| EHI_160910 | 2.410206  | Hypothetical protein                                   |
| EHI_101730 | 2.3067477 | Surface antigen ariel1, putative                       |
| EHI_086580 | 2.1185293 | Vacuolar protein sorting 35, putative                  |
| EHI_036870 | 2.1124442 | Hypothetical protein                                   |
| EHI_086570 | 2.0507612 | Hypothetical protein                                   |
| EHI_119510 | 2.036392  | Hypothetical protein                                   |
| EHI_170590 | 1.9925152 | Hypothetical protein                                   |
| EHI_166840 | 1.9784436 | Hypothetical protein                                   |
| EHI_036890 | 1.9760622 | ATPase, Vps4 oligomerisation domain containing protein |
| EHI_153680 | 1.9444319 | Carbohydrate degrading enzyme, putative                |
| EHI_161030 | 1.8471569 | Rab family GTPase                                      |
| EHI_156670 | 1.8327076 | Serine/threonine-protein kinase 3, putative            |
| EHI_156310 | 1.8271518 | Ribonuclease, putative                                 |
| EHI_036900 | 1.8162141 | DEAD/DEAH box helicase, putative                       |
| EHI_012990 | 1.7510566 | Hypothetical protein                                   |
| EHI_160890 | 1.7475164 | Hypothetical protein                                   |
| EHI_074150 | 1.7419256 | Hypothetical protein                                   |
| EHI_189970 | 1.7296472 | Amino acid permease, putative                          |
| EHI_129350 | 1.6729357 | Hypothetical protein, conserved                        |
| EHI_192750 | 1.6614851 | Hypothetical protein, conserved                        |
| EHI_041580 | 1.6552237 | Hypothetical protein                                   |
| EHI_131520 | 1.6309185 | Hypothetical protein                                   |
| EHI_006710 | 1.6155498 | Hypothetical protein, conserved                        |
| EHI_129780 | 1.5924968 | Hypothetical protein                                   |
| EHI_160860 | 1.5869534 | Inositol polyphosphate 5-phosphatase, putative         |
| EHI_192490 | 1.5807892 | Hypothetical protein                                   |
| EHI_149840 | 1.5573486 | Hypothetical protein, conserved domain containing      |
| EHI_197410 | 1.5567738 | Cation transporter, putative                           |
| EHI_158610 | 1.5472578 | Activator 1 140 kDa subunit, putative                  |
| EHI_146980 | 1.5348405 | Hypothetical protein, conserved domain containing      |
| EHI_017660 | 1.5024832 | Hypothetical protein                                   |
| EHI_113910 | 1.4979384 | Hypothetical protein                                   |
| EHI_128110 | 1.4896221 | Rab family GTPase                                      |
| EHI_009800 | 1.4726119 | Phosphatidylserine synthase, putative                  |
| EHI_166370 | 1.4679496 | Hypothetical protein                                   |
| EHI_063680 | 1.4234157 | Hypothetical protein                                   |
| EHI_128100 | 1.4137117 | Peptidyl-prolyl cis-trans isomerase, putative          |
| EHI_109010 | 1.4021786 | Hypothetical protein                                   |
| EHI_116470 | 1.4010212 | Hypothetical protein, conserved domain containing      |
| EHI_085720 | 1.3790215 | Hypothetical protein                                   |
| EHI_161040 | 1.3732705 | Hypothetical protein                                   |

|            |           |                                                  |
|------------|-----------|--------------------------------------------------|
| EHI_100360 | 1.3675051 | CLL-associated antigen KW-2, putative            |
| EHI_080260 | 1.3669443 | Hypothetical protein                             |
| EHI_099190 | 1.3651347 | WD repeat protein                                |
| EHI_051720 | 1.3376491 | Transporter, major facilitator family            |
| EHI_076870 | 1.3344749 | Steroid 5-alpha reductase, putative              |
| EHI_167050 | 1.3182443 | 60S ribosomal protein L34, putative              |
| EHI_006690 | 1.3155744 | DNA polymerase delta catalytic subunit, putative |
| EHI_170580 | 1.3137    | Sec61 alpha subunit, putative                    |
| EHI_006810 | 1.3107325 | 14-3-3 protein 3                                 |
| EHI_127260 | 1.3056942 | PH domain protein                                |
| EHI_029050 | 1.2891352 | Long-chain-fatty-acid--CoA ligase, putative      |
| EHI_099810 | 1.2834158 | Exocyst complex component sec10, putative        |
| EHI_146950 | 1.2718871 | Acid phosphatase, putative                       |
| EHI_194060 | 1.2609698 | CAAX amino terminal protease family              |
| EHI_159570 | 1.2528473 | Mob1/phocein family protein                      |
| EHI_039860 | 1.2154683 | Hypothetical protein                             |
| EHI_080250 | 1.2091007 | Hypothetical protein                             |
| EHI_153450 | 1.1904798 | Transporter, major facilitator family            |
| EHI_105140 | 1.1828128 | 40S ribosomal protein S15a, putative             |
| EHI_155660 | 1.1595054 | Elongation factor 2, putative                    |
| EHI_146180 | 1.0913334 | Rho family GTPase                                |
