# Supplementary material for: Attenuation of In Vitro and In Vivo Virulence Is Associated with Repression of Gene Expression of AIG1 Gene in Entamoeba histolytica
Source: MDPI journal article supplement (doi:10.3390/pathogens12030489), 2023-03-21
Supplement: s1 [file s1]

**Table S1. Primer used for amplification in qPCR assays.**

| Gene name                                       | Access          | Sequence                            |
|-------------------------------------------------|-----------------|-------------------------------------|
| <b>AIG1 family protein</b>                      | EH1_180390 (F)* | 5'-TAACGATTCCAAAGGTCAAGAAA-3'       |
|                                                 | EH1_180390 (R)* | 5'-AAAAACACATGCACTTTGTCCATACT-3'    |
| <b>EhRab8A</b>                                  | EH1_199820 (F)  | 5'-TTGTTGGAAATAAGTGTGATG-3'         |
|                                                 | EH1_199820 (R)  | 5'-GATTCAGTTGGTTGGGTTT-3'           |
| <b>WH2 motif domain containing protein</b>      | EH1_050810 (F)  | 5'-TACACCACAACCAAAAGACA-3'          |
|                                                 | EH1_050810 (R)  | 5'-CTTTAACATCAGTGCTTCCA-3'          |
| <b>Heat shock protein 70</b>                    | EH1_123490 (F)  | 5'-AACAAAGACAAGTTATTTACACAC-3'      |
|                                                 | EH1_123490 (R)  | 5'-CCTCCACCAAAATCAAACAC-3'          |
| <b>Glyceraldehyde-3-phosphate dehydrogenase</b> | EH1_008200 (F)  | 5'-ATTAAAATATGATACCGTCCACAGA-3'     |
|                                                 | EH1_008200 (R)  | 5'-TTCAACAACATAATCAACTCCAA-3'       |
| <b>Amoebapore A</b>                             | EH1_159480 (F)  | 5'-GCAACCTTTGCACTGGACTT-3'          |
|                                                 | EH1_159480 (R)  | 5'-GCATTGGCATCAACTTTGTC-3'          |
| <b>Amoebapore B</b>                             | EH1_194540 (F)  | 5'-TTGATGGTGCTCAAGCTGTT-3'          |
|                                                 | EH1_194540 (R)  | 5'-CTTTTCGCAAACAACGACTG-3'          |
| <b>Amoebapore C</b>                             | EH1_118270 (F)  | 5'-TCCTGTTTGTACATCACTTGTGTTGG-3'    |
|                                                 | EH1_118270 (R)  | 5'-GCACAGAGTGTTTCAAGATAATCAGTTAC-3' |
| <b>Cysteine proteinase 5</b>                    | EH1_168240 (F)  | 5'-GCTGCTATGACTGAGGCTGA-3'          |
|                                                 | EH1_168240 (R)  | 5'-TGATCCACATGATGCTTGGT-3'          |
| <b>Gal-lectin 35kDa</b>                         | EH1_035690 (F)  | 5'-TGCACATGTCCAATGTGTTG-3'          |
|                                                 | EH1_035690 (R)  | 5'-CCATGCATTTCACTTTTGGTT-3'         |
| <b>Gal-lectin subunit Igl2</b>                  | EH1_065330 (F)  | 5'-GCCAGAAAAGCAACTGATGGT-3'         |
|                                                 | EH1_065330 (R)  | 5'-TGCTTCAGTTGCACTACACC-3'          |
| <b>Gal-lectin light subunit</b>                 | EH1_148790 (F)  | 5'-GCACTAAAAACTCCACTCTCAGC-3'       |
|                                                 | EH1_148790 (R)  | 5'-TTGCTGATACGTCTGATGGAC-3'         |
| <b>Glyceraldehyde-3-phosphate dehydrogenase</b> | EH1_008200 (F)  | 5'-ATTAAAATATGATACCGTCCACAGA-3'     |
|                                                 | EH1_008200 (R)  | 5'-TGAGTAGCAGTAGTAGCATGAATAGTT-3'   |

\* F = Forward

\* R = Reverse
