# Supplementary material for: Attenuation of In Vitro and In Vivo Virulence Is Associated with Repression of Gene Expression of AIG1 Gene in Entamoeba histolytica
Source: MDPI journal article supplement (doi:10.3390/pathogens12030489), 2023-03-21
Supplement: s1 [file s1]

**Table S6.** EHI\_180390 gene expression in *E. histolytica* strains.

| Strain     | Fold change |
|------------|-------------|
| UG10       | 1           |
| UG10spAIG1 | 6.95±0.9    |
| HM-1       | 12.7±1.2    |

The lowest expression of the *EhAIG1* gene was in the UG10 strain, and a value of 1 was assigned. Fold Change for the other strains was assigned with respect to the UG10 strain.
