# Supplementary material for: Attenuation of In Vitro and In Vivo Virulence Is Associated with Repression of Gene Expression of AIG1 Gene in Entamoeba histolytica
Source: MDPI journal article supplement (doi:10.3390/pathogens12030489), 2023-03-21
Supplement: s1 [file s1]

**Table S5 Quantitative expression levels of classical virulence genes for HM-1 and UG10 *Entamoeba histolytica* strains.**

| Gene              | Strain |                 |
|-------------------|--------|-----------------|
|                   | HM-1   | UG10            |
| <i>Eh IgL</i>     | 1.0    | 1.60 $\pm$ 0.34 |
| <i>Eh IgL</i>     | 1.0    | 1.42 $\pm$ 0.06 |
| <i>Eh IgL</i>     | 1.0    | 1.01 $\pm$ 0.24 |
| <i>Eh CP5</i>     | 1.0    | 1.21 $\pm$ 0.02 |
| <i>Eh adh 112</i> | 1.0    | 1.09 $\pm$ 0.07 |
| <i>Ef ap-a</i>    | 1.0    | 1.00 $\pm$ 0.07 |
| <i>Ef ap-b</i>    | 1.0    | 1.45 $\pm$ 0.10 |
| <i>Ef ap-c</i>    | 1.0    | 0.95 $\pm$ 0.04 |

Data were normalized using the  $\Delta\Delta\text{CT}$  method using the constitutive *Ehgapdh* gene as a control. Gene expression in the control HM-1 strain was assigned a relative value of 1. Gene values for UG10 strain represent expression folds with respect to those in the HM-1 strain.
