# Supplementary material for: Attenuation of In Vitro and In Vivo Virulence Is Associated with Repression of Gene Expression of AIG1 Gene in Entamoeba histolytica
Source: MDPI journal article supplement (doi:10.3390/pathogens12030489), 2023-03-21
Supplement: s1 [file s1]

**Table S2. Primer used for amplification in endpoint PCR assays.**

| Gene name                                  | Access            | Sequence                          |
|--------------------------------------------|-------------------|-----------------------------------|
| <b>P-glycoprotein family protein 1</b>     | EHI_114150 (F)*   | 5'-AACAGTGCTACAACATCCTT-3'        |
|                                            | EHI_114150 (R)*   | 5'-TCATGTGCATTTGCCATTTTA-3'       |
| <b>P-glycoprotein family protein 5</b>     | EHI_175450 (F)    | 5'-GTAGGAGGTGCAGTATTTCC-3'        |
|                                            | EHI_175450 (R)    | 5'-CCATCCTATTTCTTGTTTGAC-3'       |
| <b>AIG1 protein</b>                        | EHI_180390 (F)    | 5'-TAACGATTCCAAAGGTCAAGAAA-3'     |
|                                            | EHI_180390 (R)    | 5'-AAAAACACATGCACCTTTGTCCATACT-3' |
| <b>EhRab8A</b>                             | EHI_199820 (F)    | 5'-ATTGGAGAAAGTGGAGTTGGGAAAA-3'   |
|                                            | EHI_199820 (R)    | 5'-AGTTGATTGAGTTGGTTGGGTTTGT-3'   |
| <b>WH2 motif domain containing protein</b> | EHI_050810 (F)    | 5'-TACACCACAACCAAAAAGACA-3'       |
|                                            | EHI_050810 (R)    | 5'-CTTTAACATCAGTGCTTCCA-3'        |
| <b>Heat shock protein 70</b>               | EHI_123490 (F)    | 5'-AACCAACTGCAGCCGCATTATATTA-3'   |
|                                            | EHI_123490 (R)    | 5'-TACAGGAACAATTGCAAAACCACGA-3'   |
| <b>Amoebapore A</b>                        | EHI_159480 (F)    | 5'-CAAGCATGAATCTTAGCAC-3'         |
|                                            | EHI_159480 (R)    | 5'-CTACTCACCAAGGAGAAATC-3'        |
| <b>Gal-lectin 35kDa</b>                    | EHI_035690 (F)    | 5'-CATTTGGTAAGACTCAAGACGGA-3'     |
|                                            | EHI_035690 (R)    | 5'-TGGTGCATCTGATAATGGTGGGTT-3'    |
| <b>Gal-lectin lectin light subunit</b>     | EHI_148790 (F)    | 5'-ATTGCTGATACGTCTGATGGAC-3'      |
|                                            | EHI_148790 (R)    | 5'-GTTCTGTTGGTCTAATGGTGCTT-3'     |
| <b>Gal-lectin Igl2</b>                     | EHI_065330 (F)    | 5'-TTCTGTAGACATTAAACCACCACCA-3'   |
|                                            | EHI_065330 (R)    | 5'-ATTCTTCTACTATTTTCTTCTTCTCA-3'  |
| <b>Cysteine proteinase 5</b>               | EHI_168240 (F)    | 5'-AAAGAATGTTTCATCAACTCAGCTT-3'   |
|                                            | EHI_168240 (R)    | 5'-TTAAGCATCAGCAACCCCAACTGG-3'    |
| <b>Small subunit ribosomal RNA gene</b>    | ssr RNA (F)       | 5'-GTACAAAATGGCCAATTTCATTCAATG-3' |
|                                            | ssr RNA (R)       | 5'-ACTACCAACTGATTGATAGATCAG-3'    |
| <b>Neomycin resistance family</b>          | pEhEx plasmid (F) | 5'-ATGATTGAACAAGATGGATTGCAC-3'    |
|                                            | pEhEx plasmid (R) | 5'-TCAGAAGAAGTTCGTCAAGAAGGC-3'    |
| <b>AIG1 protein (overexpressing)</b>       | EHI_180390 (F)    | 5'-GGAAGATCTATGAAACAACTAAGTTAC-3' |
|                                            | EHI_180390 (R)    | 5'-CCGCTCGAGTTAATTTGACCACTT-3'    |

\*F = Forward

\*R = Reverse
