# Supplementary material for: Attenuation of In Vitro and In Vivo Virulence Is Associated with Repression of Gene Expression of AIG1 Gene in Entamoeba histolytica
Source: Pathogens. 2023 Mar 21;12(3):489. doi: 10.3390/pathogens12030489 (PMC10051847; doi:10.3390/pathogens12030489)
Supplement: Supplementary file 1 [file pathogens-12-00489-s001.zip]

Archive with 17 entries (16 files):
- Supplementary material/
- Supplementary material/Figure S1.pdf
- Supplementary material/Figure S3.pdf
- Supplementary material/Figure S2.pdf
- __MACOSX/Supplementary material/._Figure S2.pdf
- __MACOSX/Supplementary material/._Table S6.pdf
- Supplementary material/Table S4.pdf
- __MACOSX/Supplementary material/._Table S4.pdf
- Supplementary material/Table S5.pdf
- __MACOSX/Supplementary material/._Table S5.pdf
- Supplementary material/Table S1.pdf
- __MACOSX/Supplementary material/._Table S1.pdf
- Supplementary material/Table S2.pdf
- __MACOSX/Supplementary material/._Table S2.pdf
- Supplementary material/Table S3.pdf
- __MACOSX/Supplementary material/._Table S3.pdf
- Supplementary material/Table S6.pdf
